# Supplementary material for: miR-632 Induces DNAJB6 Inhibition Stimulating Endothelial-to-Mesenchymal Transition and Fibrosis in Marfan Syndrome Aortopathy
Source: MDPI journal article supplement (doi:10.3390/ijms242015133), 2023-10-13
Supplement: s1 [file s1]

**Supplemental Table S1. Sequences of primers used for Real-time PCR**

| <b>PRIMER</b>             | <b>SEQUENCES</b>                                  |
|---------------------------|---------------------------------------------------|
| <b>h-CD31</b>             | Forward: 5'-GCCAGGTTGAGAAACTCTGC-3'               |
| <b>h-DNAJB6</b>           | Forward: 5'-CATGCCTCACCCGAGGATATT-3'              |
| <b>h-FN ED-A</b>          | Forward: 5'-CCAGTCCACAGCTATTCCTG-3'               |
| <b>h-VIMENTIN</b>         | Forward: 5'-TCCAAGTTTGCTGACCTC-3'                 |
| <b>h-GAPDH</b>            | Forward: 5'-ACGGATTTGGTCGTATTGG-3'                |
| <b>hsa-miR-632</b>        | MIRAP00623 (Merk Merck KGaA, Darmstadt, Germania) |
| <b>RNU6-1 (for miRNA)</b> | MIRCP000001 (Merk Merck KGaA)                     |
